# Supplementary material for: Single-cell spatiotemporal analysis reveals cell fates and functions of transplanted mesenchymal stromal cells during bone repair
Source: PubMed Central journal article supplement — Stem Cell Reports. 2022 Sep 22;17(10):2318–33. doi: 10.1016/j.stemcr.2022.08.008 (PMC9561611; doi:10.1016/j.stemcr.2022.08.008), 2022-09-22
Supplement: mmc1.pdf [file mmc1.pdf]

**Stem Cell Reports, Volume 17**

## **Supplemental Information**

### **Single-cell spatiotemporal analysis reveals cell fates and functions of transplanted mesenchymal stromal cells during bone repair**

**Chengyu Yang, Zeshun Li, Yang Liu, Runpeng Hou, Minmin Lin, Linhao Fu, Decheng Wu, Quanying Liu, Kai Li, and Chao Liu**

## Supplemental Information

Single cell spatiotemporal analysis reveals cell fates and functions of transplanted mesenchymal stromal cells during bone repair

Author list:

Chengyu Yang, <sup>1,2,#</sup> Zeshun Li, <sup>1,2,#</sup> Liu Yang, <sup>1,2</sup> Runpeng Hou, <sup>1,2</sup> Minmin Lin, <sup>1,2</sup> Linhao Fu, <sup>1,2</sup> Decheng Wu, <sup>1,2</sup> Quanying Liu, <sup>1,2</sup> Kai Li, <sup>1,2,\*</sup> and Chao Liu <sup>1,2,\*</sup>

Affiliations:

<sup>1</sup> Department of Biomedical Engineering, College of Engineering, Southern University of Science and Technology, Shenzhen, 518055, China

<sup>2</sup> Guangdong Provincial Key Laboratory of Advanced Biomaterials, Southern University of Science and Technology, Shenzhen, 518055, China

Author footnotes:

# These authors contributed equally

\* Co-senior authors

Contact information:

\* Correspondence: lik@sustech.edu.cn (Kai Li)

\* Correspondence: liuc33@sustech.edu.cn (Chao Liu)

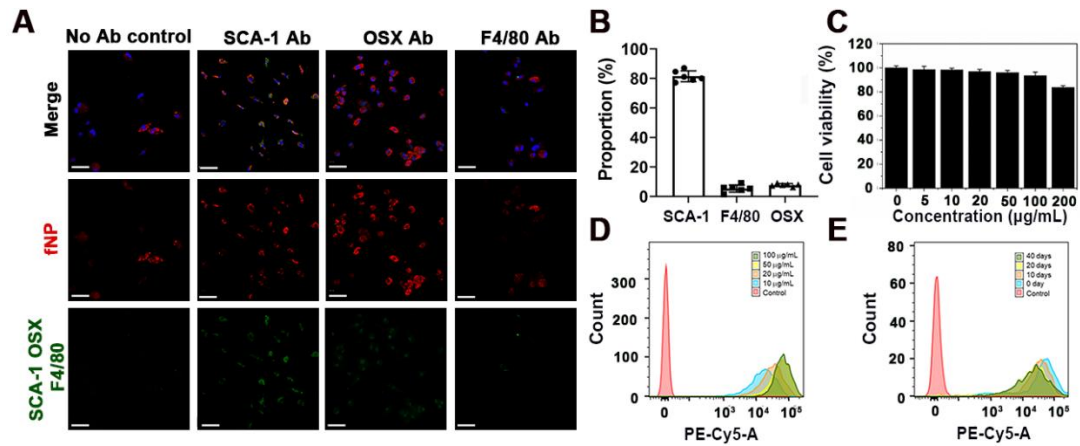

**Figure S1. Mouse BMSCs labeling by fNP, related to Figure 1.** (A) Representative fluorescence images for fNP, SCA-1, OSX and F4/80 in BMSCs after 50μg/ml fNP incubation for 12h; scale bare=20μm. (B) Quantitative assessment for the proportion of SCA-1+, F4/80+ and OSX+ cells versus BMSCs. (C) Metabolic viability of BMSCs after incubation with 0, 5, 10, 20, 50, 100 and 200μg/ml fNPs for 10 days. (D) Flow cytometry histograms of BMSCs labeling efficiency after incubation with 0, 10, 20, 50 and 100μg/ml fNPs for 12h. (E) Flow cytometry histograms and fluorescent images of BMSCs after incubation with 50μg/ml fNPs for 12h and subculture for 40 days; n=6 for each group.

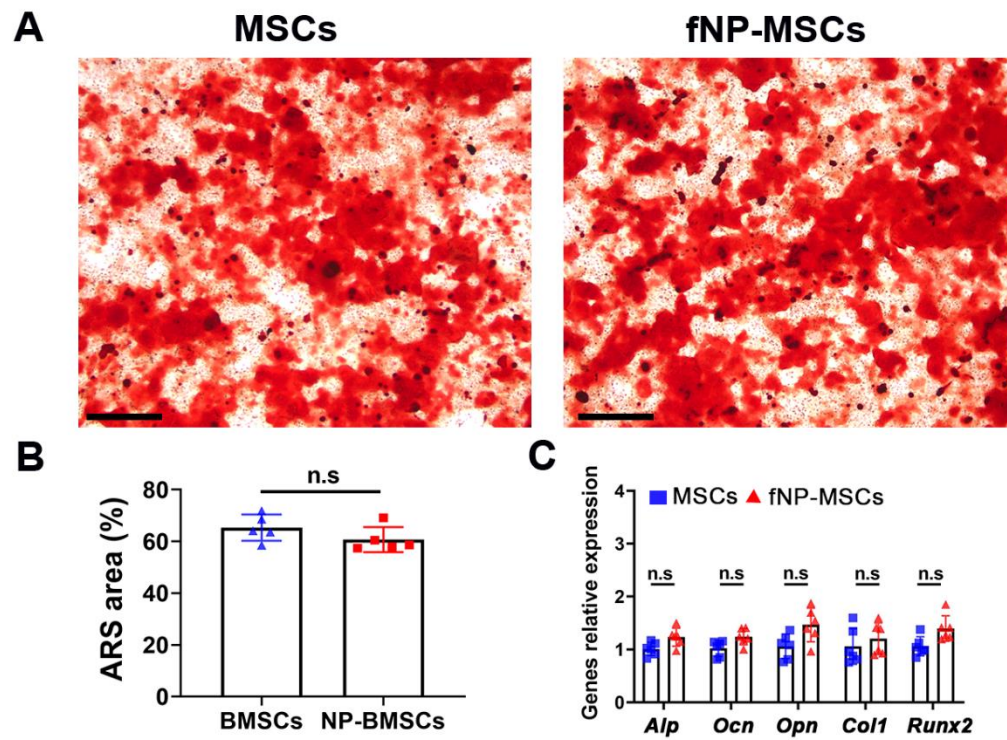

**Figure S2. Effect of nanoparticles on osteogenic differentiation of BMSCs in vitro, related to Figure 1.** (A) osteogenic differentiation capacities of MSCs with and without fNP labeling demonstrated by alizarin red staining (ARS); scale bare=50 $\mu$ m. (B) Quantitative assessment of area proportion of ARS. (C) Representative gene expression analysis for osteogenic genes from labeling/normal MSCs; n=6 for each group.

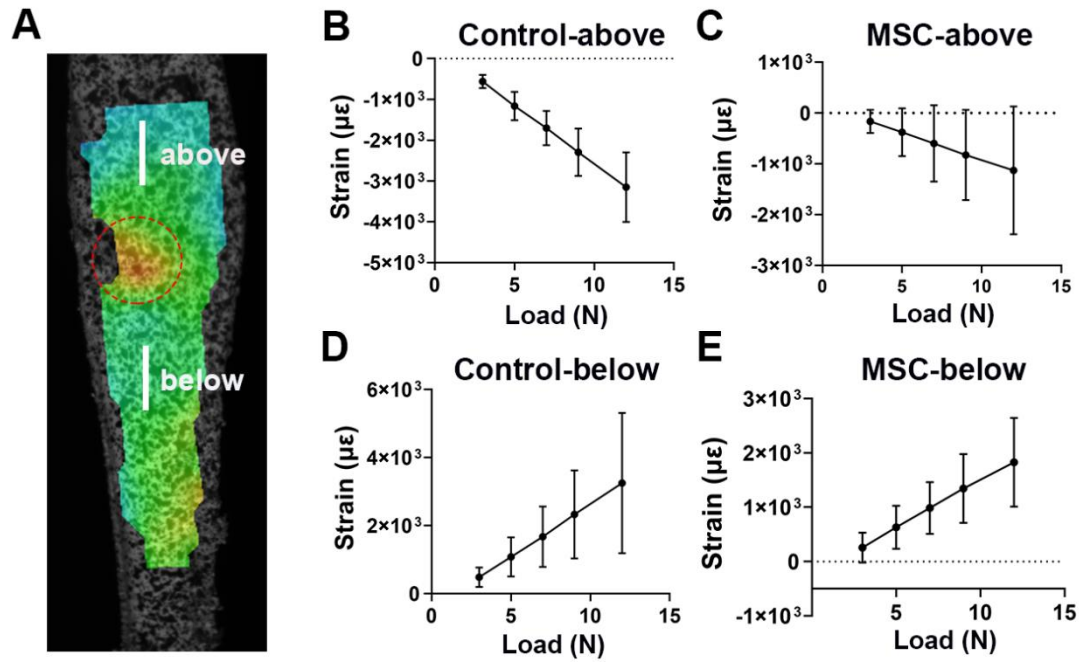

**Figure S3. DIC analysis of surface strain of tibial defect and surrounding bone, related to Figure 2.** (A) Representative strain map on the medial side of the tibia isolated from 11 weeks old female C57BL/6 mice, 10 days after the creation of a circular defect (red dotted circle). (B and C) Quantitative analysis of tensile strain 1mm above/below defect region.

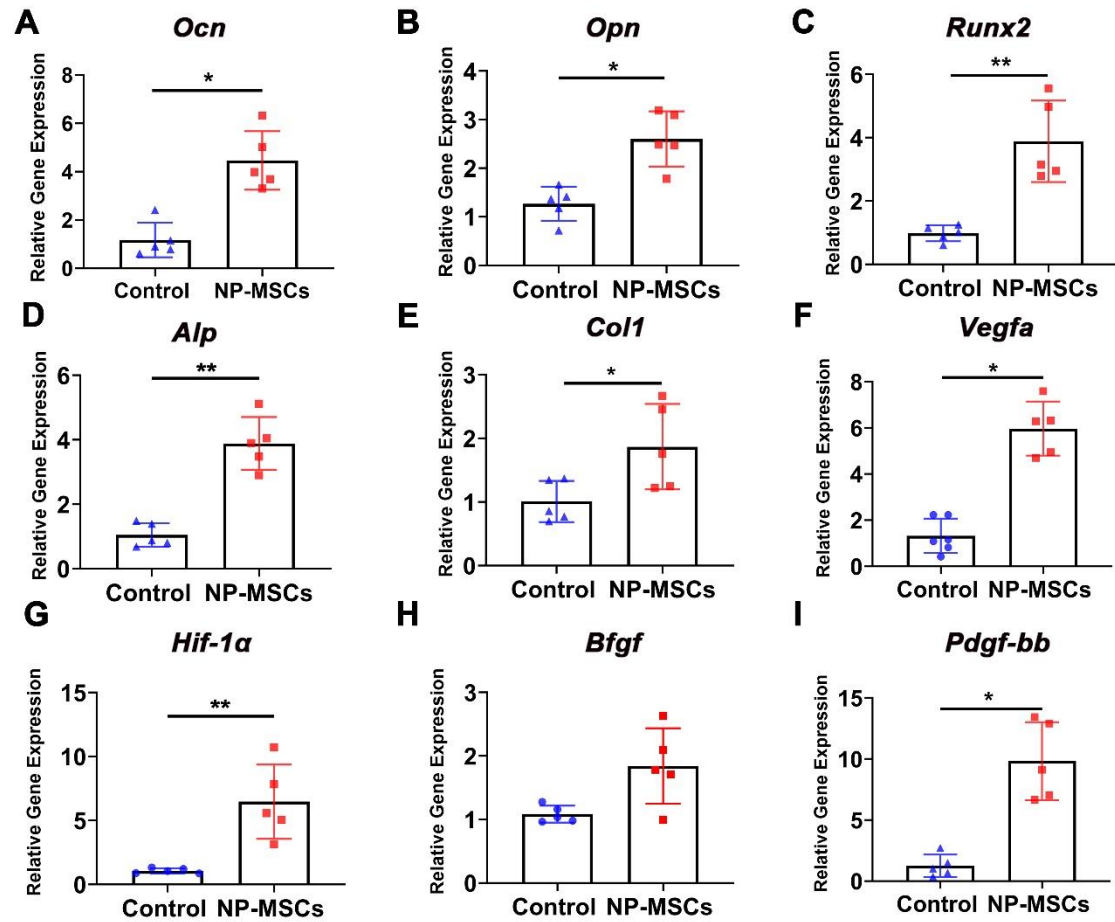

**Figure S4. Relative gene expression analysis for defect region from PSD 10 samples, related to Figure 4.** Relative gene expression of (A) *Runx2*, (B) *Alp*, (C) *Ocn*, (D) *Opn*, (E) *Col1*, (F) *Vegfa*, (G) *Hif-1α*, (H) *Bfgf* and (I) *Pdgf-bb* in defect area on PSD 10. \*: P<0.05; \*\*: P<0.01. n=6 mice for each group.

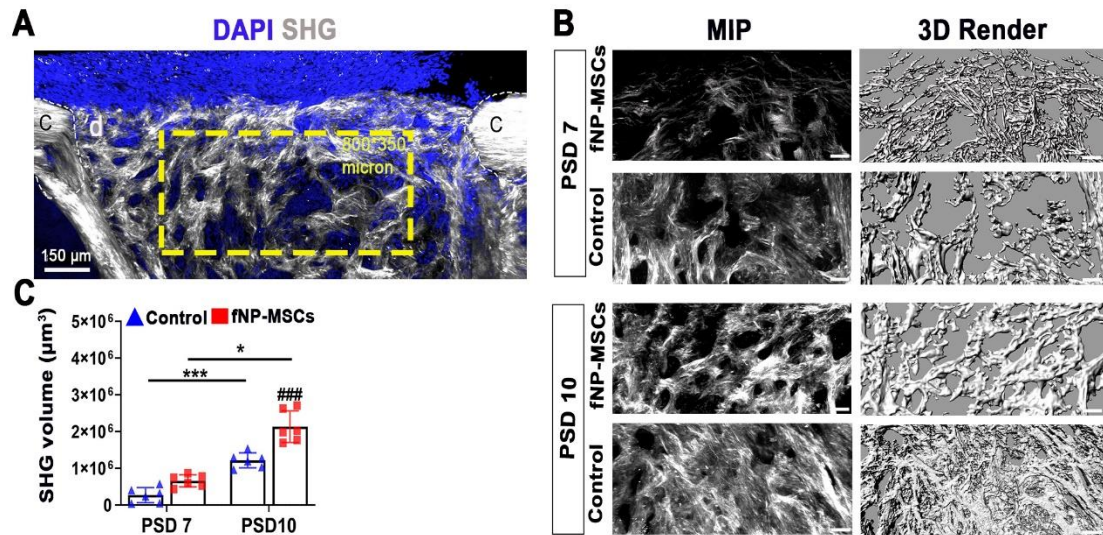

**Figure S5. Local-delivered fNP-MSCs increased collagen fibers formation during bone defect repair, related to Figure 4.** (A) Representative fluorescence images for collagen fibers (SHG, gray) and DAPI in three-dimensional space within tibial defect; scale bar= 50 $\mu\text{m}$ ; c: cortical bone; d: defect area; yellow dotted line: volume of interest (VOI); (B) MIP and 3D rendered surface of collagen fibers from (a) on PSD 7 and 10; scale bar= 50 $\mu\text{m}$ ; (C) Quantitative assessment for collagen fibers volume in defect area at each time point; MIP: maximum intensity projection; SHG: second harmonic generation. \*:  $P < 0.05$ ; \*\*\*:  $P < 0.001$ ; ###:  $P < 0.001$ ; n=6 mice for each group.

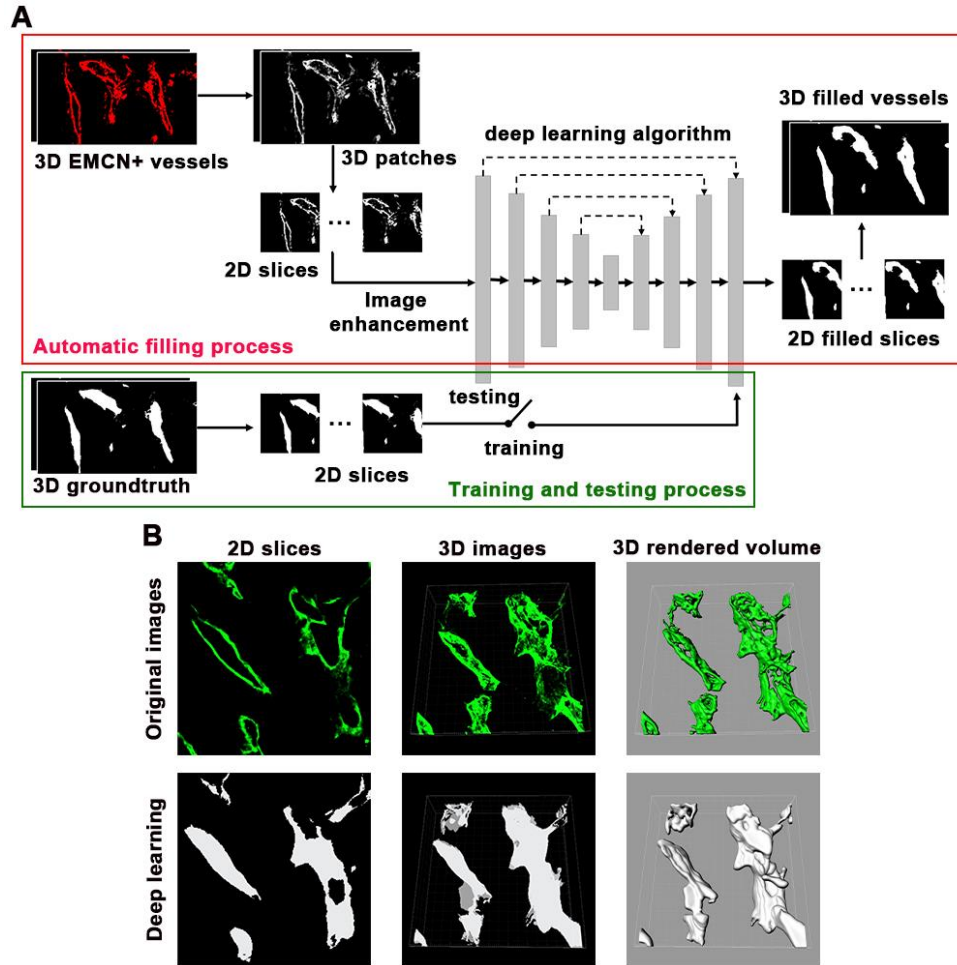

**Figure S6. 3D digital rendering of the blood volume by utilizing deep learning algorithm, related to Figure 6.** (A) The framework of filling the blood volume from EMCN+ vessels in defect by utilizing deep learning algorithm: the 3D groundtruth, which was manually filled according to 3D vascular images, was separated to create 2D section, and applied to train deep learning algorithm; this well-trained algorithm was utilized to automatically fill blood volume from 3D EMCN+ vessels; green box: training and testing process; red box: automatic filling process. (B) Qualitative evaluation of the filled vessels.

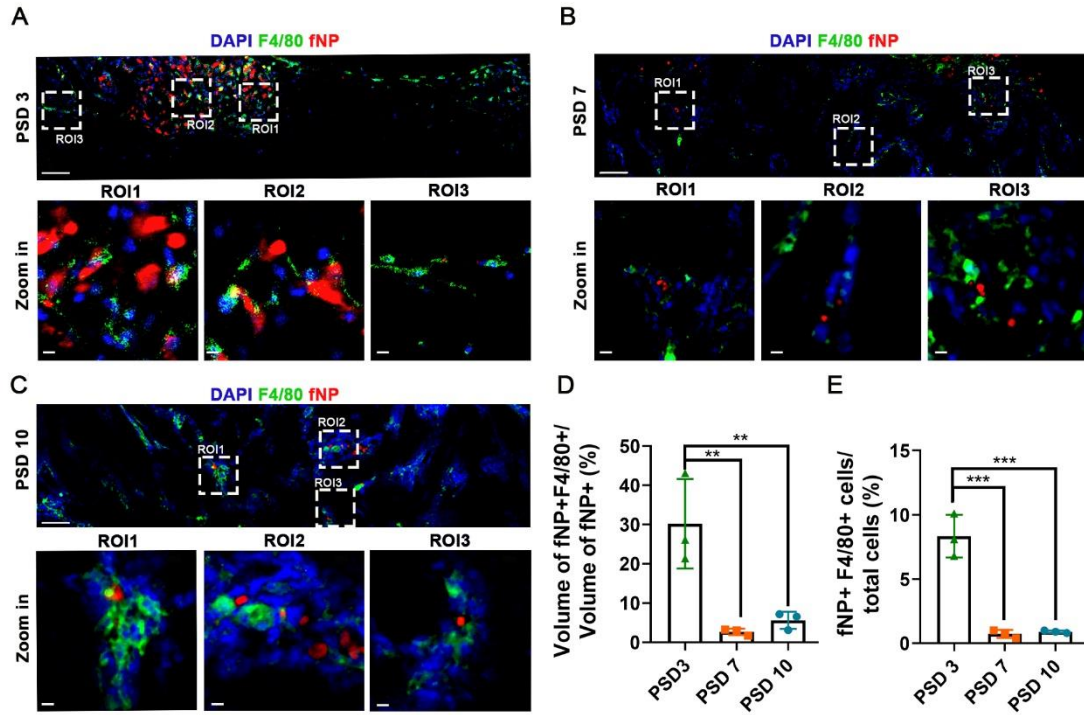

**Figure S7. Co-localization of fNP with macrophages in bone defect area, related to Figure 7.** Representative confocal microscopy images of macrophage marker F4/80 and nanoparticle signals (fNP) in defect area on (A) PSD 3, (B) PSD 7 and (C) PSD 10; with zoomed-in images below. Scale bar = 50 $\mu$ m for large images; Scale bar= 5 $\mu$ m for zoomed-in images. (D) Quantification of proportion of fNP+ F4/80+ volume over total fNP+ volume. (E) Quantification of proportion of fNP+F4/80+ cells over total cells. n=3; \*\*: P<0.01; \*\*\*: P<0.001

**Table S1. The primer sequences for tissue q-PCR, related to Figure 4.**

| Primer name                        | Sequence (5'-3')            |
|------------------------------------|-----------------------------|
| <i>Alp</i> F                       | GGACAGGACACACACACACA        |
| <i>Alp</i> R                       | CAAACAGGAGAGCCACTTCA        |
| <i>Runx2</i> F                     | TCCCTGAACTCTGCACCAAG        |
| <i>Runx2</i> R                     | ATCTGGCTCAGGTAGGAGGG        |
| <i>Ocn</i> F                       | CTGACAAAGCCTTCATGTCCAA      |
| <i>Ocn</i> R                       | GCGCCGGAGTCTGTTCATA         |
| <i>Opn</i> F                       | AGAGCGGTGAGTCTAAGGAGT       |
| <i>Opn</i> R                       | TGCCCTTTCCGTTGTTGTCC        |
| <i>Osx</i> F                       | ATGGCGTCCTCTCTGCTTG         |
| <i>Osx</i> R                       | AAGGTCAGCGTATGGCTTCT        |
| <i>Vgfa</i> -F                     | GCACCCATGGCAGAAGGAGG        |
| <i>Vgfa</i> -R                     | CCTTGGTGAGGTTTGATCCGCATA    |
| <i>Hif-1<math>\alpha</math></i> -F | TCAAGTCAGCAACGTGGAAG        |
| <i>Hif-1<math>\alpha</math></i> -R | TATCGAGGCTGTGTCTGACTG       |
| <i>Ppar-<math>\gamma</math></i> -F | AGCTGAATCACCCAGAGTCC        |
| <i>Ppar-<math>\gamma</math></i> -R | TGCAATCAATAGAAGGAACACG      |
| <i>Pdgf-bb</i> -F                  | TTTCTCACCTGGACAGGTCG        |
| <i>Pdgf-bb</i> -R                  | AAAGAGTGGACCTGTCCAGC        |
| <i>Bfgf</i> -F                     | GGAGAAGAGCGACCCTCACATCAAG   |
| <i>Bfgf</i> -R                     | CCAGTTCGTTTCAGTGCCACATACCAA |
| <i>18S_1</i> F                     | GAGAAACGGCTACCACATCC        |
| <i>18S_1</i> R                     | CCTCCAATGGATCCTCGTTA        |
